# Supplementary material for: COVID-19 Vaccine Confidence Mediates the Relationship between Health Literacy and Vaccination in a Diverse Sample of Urban Adults
Source: MDPI journal article supplement (doi:10.3390/vaccines11121848), 2023-12-13
Supplement: s1 [file s1]

## Supplementary Materials

**Table S1.**

| Table S1: Mediation Model Estimates with Missingness Including Direct and Indirect Effects |                                          |          |                                       |
|--------------------------------------------------------------------------------------------|------------------------------------------|----------|---------------------------------------|
|                                                                                            | Path                                     | Estimate | 95% Bootstrapped Confidence Intervals |
| Missingness<br>(Yes = 1; No = 0)                                                           | <b>Mediator ==&gt; Vaccination</b>       |          |                                       |
|                                                                                            | Missingness ==> Vaccination              | -0.07    | -0.75, 0.88                           |
| Health literacy<br>(continuous)                                                            | <b>Direct effects</b>                    |          |                                       |
|                                                                                            | Health literacy ==> Vaccination          | 0.00     | -0.04, 0.04                           |
| Vaccine confidence<br>(aVCI, continuous)                                                   | <b>Mediator ==&gt; Vaccination</b>       |          |                                       |
|                                                                                            | aVCI ==> Vaccination                     | 0.87*    | 0.42, 1.58                            |
|                                                                                            | <b>Mediator ==&gt; Health literacy</b>   |          |                                       |
|                                                                                            | aVCI ==> Health literacy                 | 0.04*    | 0.03, 0.06                            |
|                                                                                            | <b>Indirect effects on Vaccination</b>   |          |                                       |
|                                                                                            | Health literacy ==> aVCI ==> Vaccination | 0.04*    | 0.02, 0.08                            |

Table S1. Note. aVCI = Adapted Vaccine Confidence Index; Estimates are unstandardized. Starred (\*) estimates indicate 95% confidence intervals not containing zero; Vaccine confidence is the mediator.

## Appendix A
